# Supplementary material for: Synthesis of Catechol Derived Rosamine Dyes and Their Reactivity toward Biogenic Amines
Source: MDPI journal article supplement (doi:10.3390/molecules26165082), 2021-08-22
Supplement: s1 [file s1]

# Supplementary Materials: Synthesis of Catechol Derived Rosamine Dyes and Their Reactivity toward Biogenic Amines

Filipe Monteiro-Silva <sup>1,†</sup>, Carla Queirós <sup>2,†</sup>, Andreia Leite <sup>2</sup>, María Teresa Rodríguez <sup>3</sup>, María José Rojo <sup>3</sup>, Tomás Torroba <sup>3</sup>, Rui C. Martins <sup>1</sup>, Ana M. G. Silva <sup>2,\*</sup> and Maria Rangel <sup>4</sup>

<sup>1</sup> Centre for Applied Photonics, INESC TEC, Faculdade de Ciências da Universidade do Porto, Rua do Campo Alegre, 4169-007 Porto, Portugal; filipe.m.silva@inesctec.pt (F.M.-S.);

rui.c.martins@inesctec.pt (R.C.M.)

<sup>2</sup> LAQV/REQUIMTE, Departamento de Química e Bioquímica, Faculdade de Ciências da Universidade do Porto, Rua do Campo Alegre, 4169-007 Porto, Portugal; carla.queiros@fc.up.pt (C.Q.);

acleite@fc.up.pt (A.L.)

<sup>3</sup> Departamento de Química, Facultad de Ciencias, Universidad de Burgos, 09001 Burgos, España; mtrod@ubu.es (M.T.R.); mjrocam@ubu.es (M.J.R.); ttorroba@ubu.es (T.T.)

<sup>4</sup> LAQV/REQUIMTE, Instituto de Ciências Biomédicas de Abel Salazar, Rua Jorge de Viterbo Ferreira 228, 4050-313 Porto, Portugal; mrangel@icbas.up.pt

\* Correspondence: ana.silva@fc.up.pt

† These authors contributed equally to this work.

\* Author to whom correspondence should be addressed: Tel: (+351)220402585 Fax: (+351)220402659; email: ana.silva@fc.up.pt

## Contents

|                                                                                                    |    |
|----------------------------------------------------------------------------------------------------|----|
| NMR spectrum of 2,3-dibenzyloxybenzaldehyde and 3,4-dibenzyloxybenzaldehyde .....                  | 2  |
| NMR spectra of rosamine 1 .....                                                                    | 3  |
| NMR spectra of rosamine 2 .....                                                                    | 6  |
| NMR spectra of rosamine 3 .....                                                                    | 8  |
| NMR spectra of rosamine 4 .....                                                                    | 11 |
| MS spectra of 1, 2, 3 and 4 .....                                                                  | 13 |
| The influence of pH variation in the fluorescence intensity of rosamine 4. ....                    | 15 |
| Detection study of rosamine 4 with different biogenic amines in solution (preliminary study) ..... | 16 |
| Detection study of rosamine 4 with different amines in solution (CH <sub>3</sub> CN) .....         | 18 |
| Detection study of rosamine 4 with different biogenic amines in gas phase .....                    | 19 |
| NMR spectra of aminopyronin 5 .....                                                                | 20 |
| <sup>1</sup> H NMR spectrum comparison between rosamine 4 and aminopyronin 5 .....                 | 21 |
| NMR spectrum of aminopyronin 6a .....                                                              | 22 |
| NMR spectrum of aminopyronin 7a .....                                                              | 22 |
| NMR spectrum of aminopyronin 7b .....                                                              | 23 |
| MS spectra of 5, 6a, 7a and 7b .....                                                               | 23 |

# NMR spectrum of 2,3-dibenzyloxybenzaldehyde and 3,4-dibenzyloxybenzaldehyde

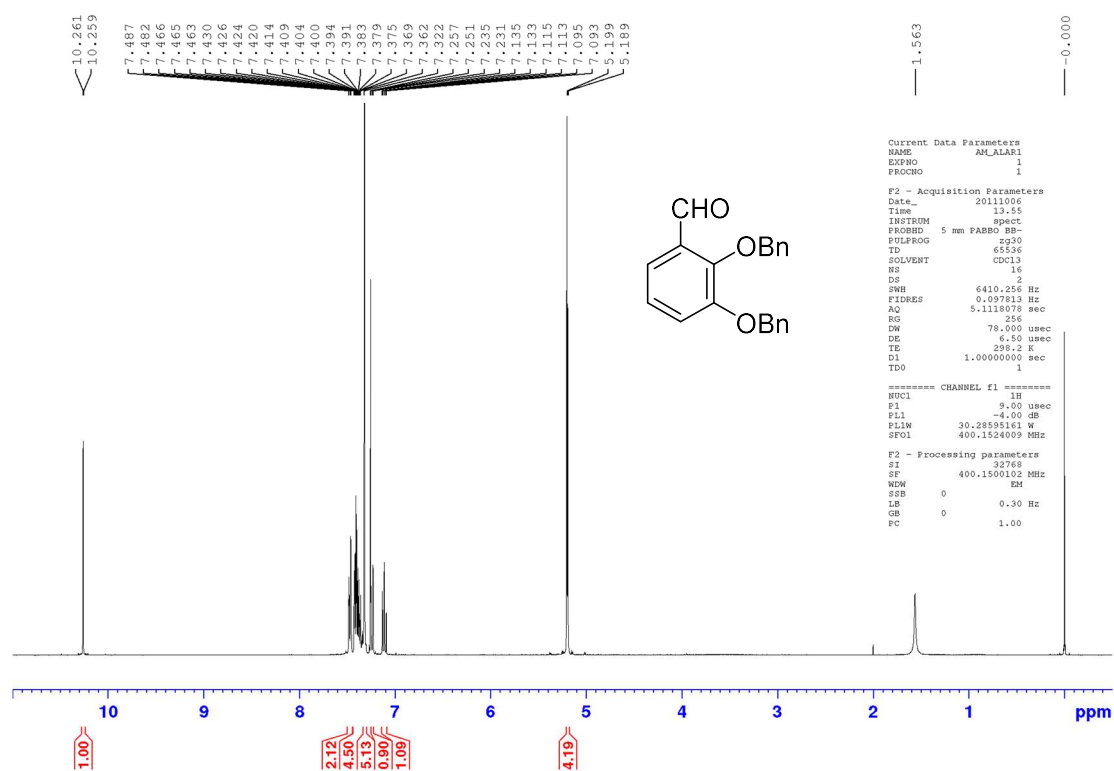

Figure S1. <sup>1</sup>H NMR spectrum (400.15 MHz, CDCl<sub>3</sub>) of 2,3-dibenzyloxybenzaldehyde.

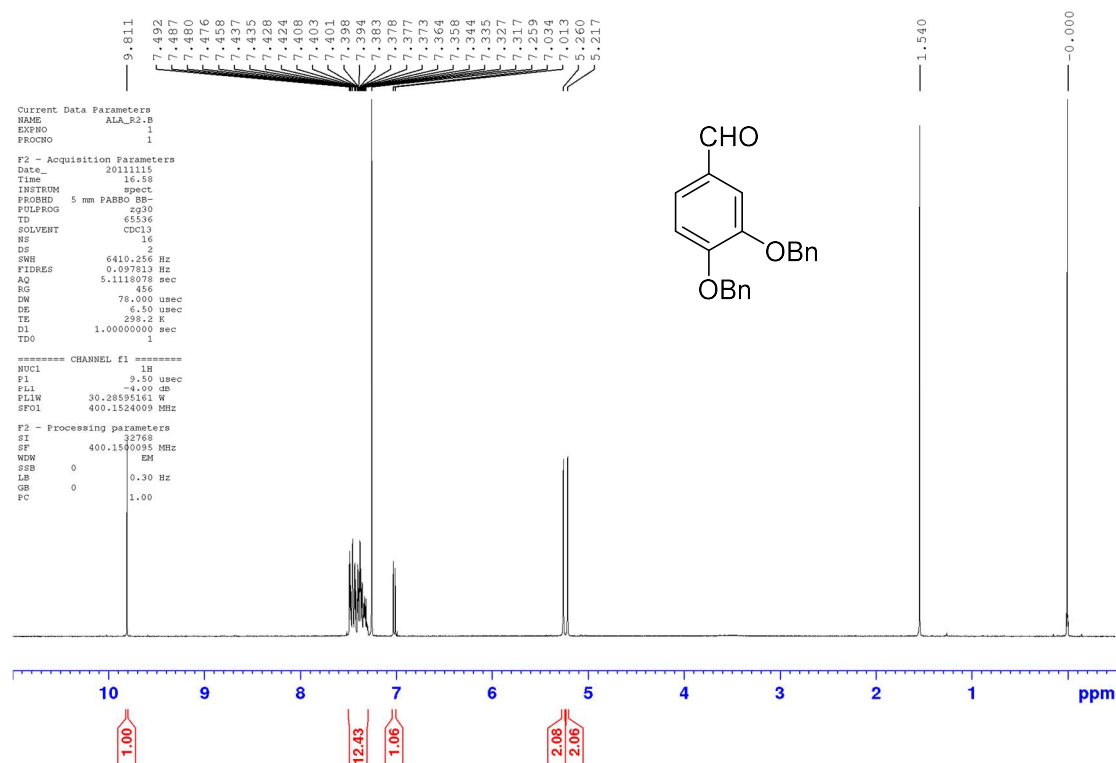

Figure S2.  $^1\text{H}$  NMR spectrum (400.15 MHz,  $\text{CDCl}_3$ ) of 3,4-dibenzyloxybenzaldehyde.

### NMR spectra of rosamine 1

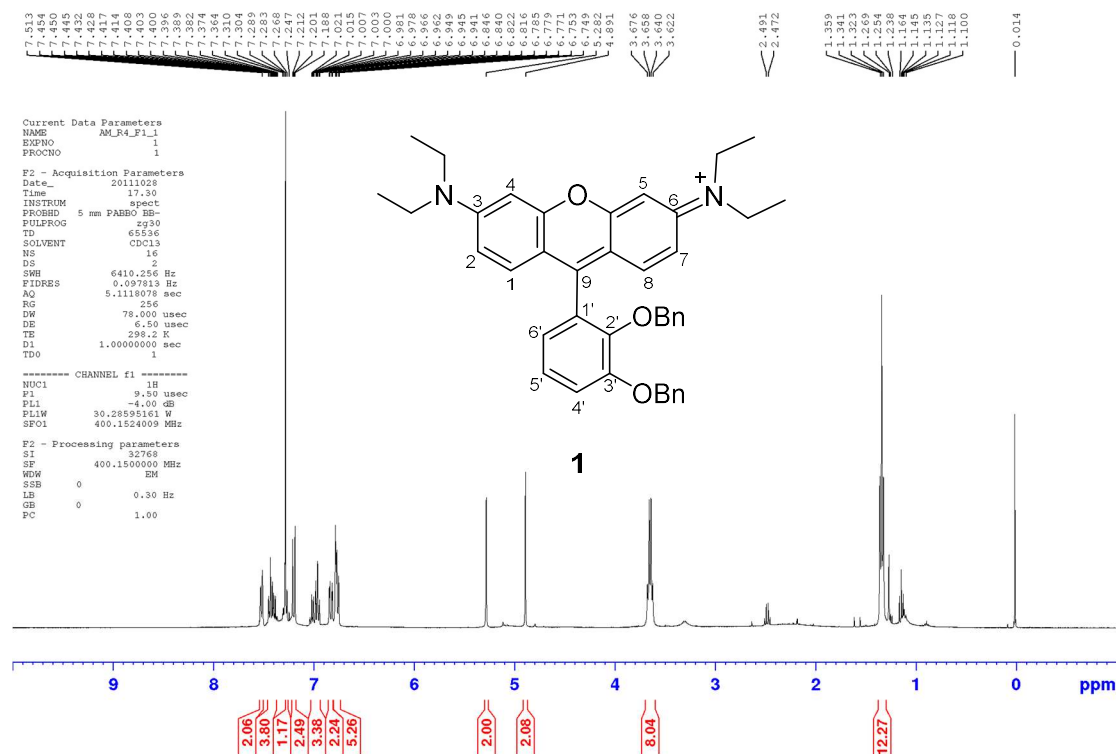

Figure S3.  $^1\text{H}$  NMR spectrum (400.15 MHz,  $\text{CDCl}_3$ ) of 1.



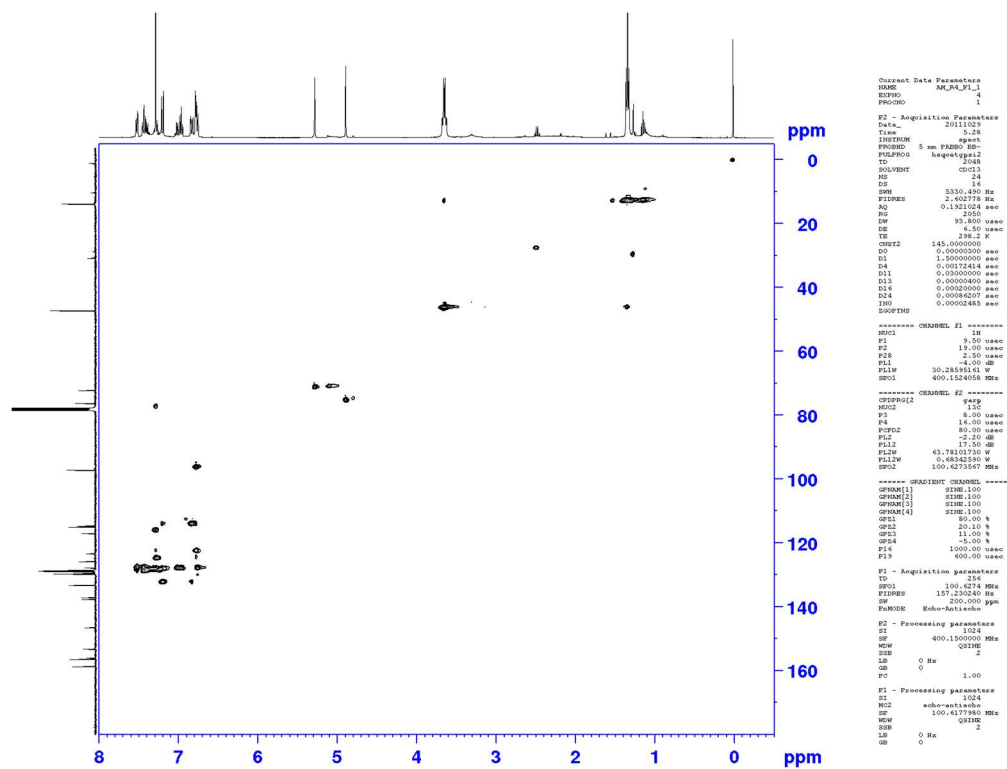

Figure S6. HSQC spectrum of 1.

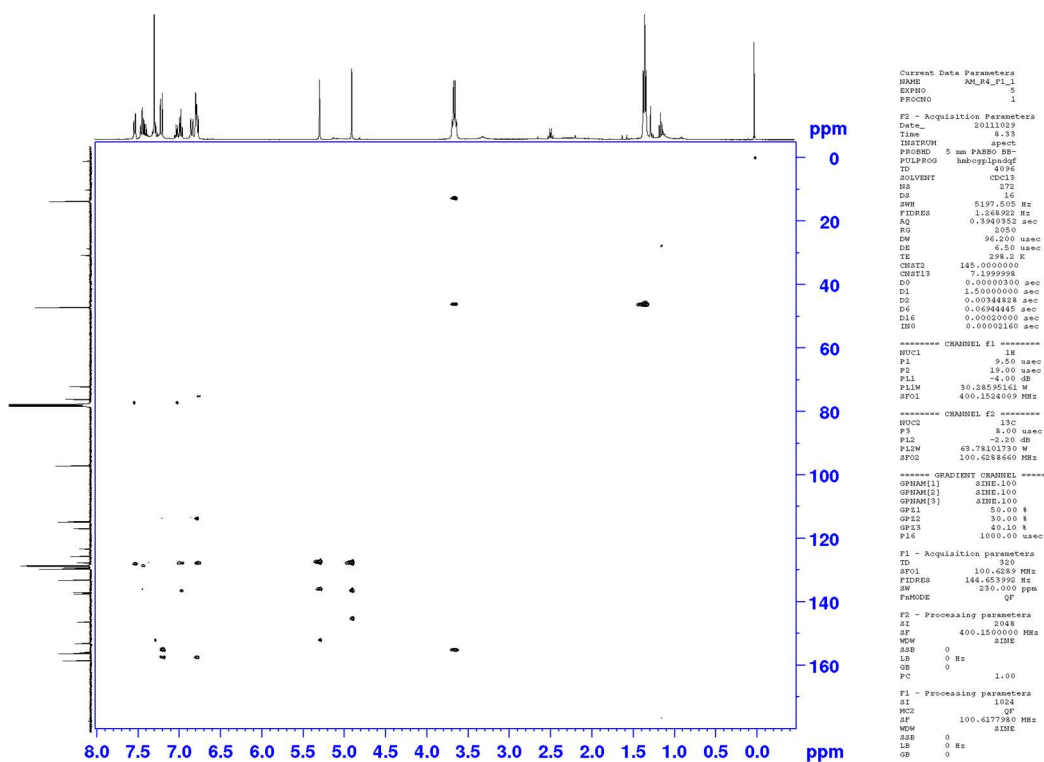

Figure S7. HMBC spectrum of 1.

## NMR spectra of rosamine 2

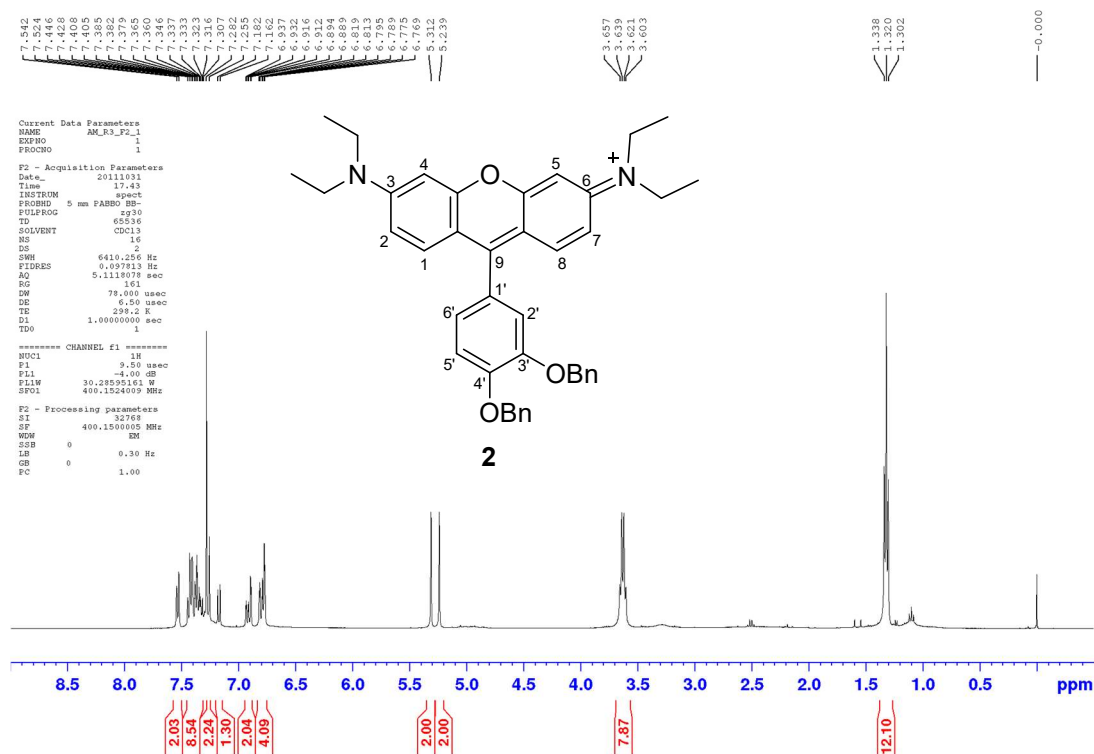

Figure S8.  $^1\text{H}$  NMR spectrum (400.15 MHz,  $\text{CDCl}_3$ ) of 2.

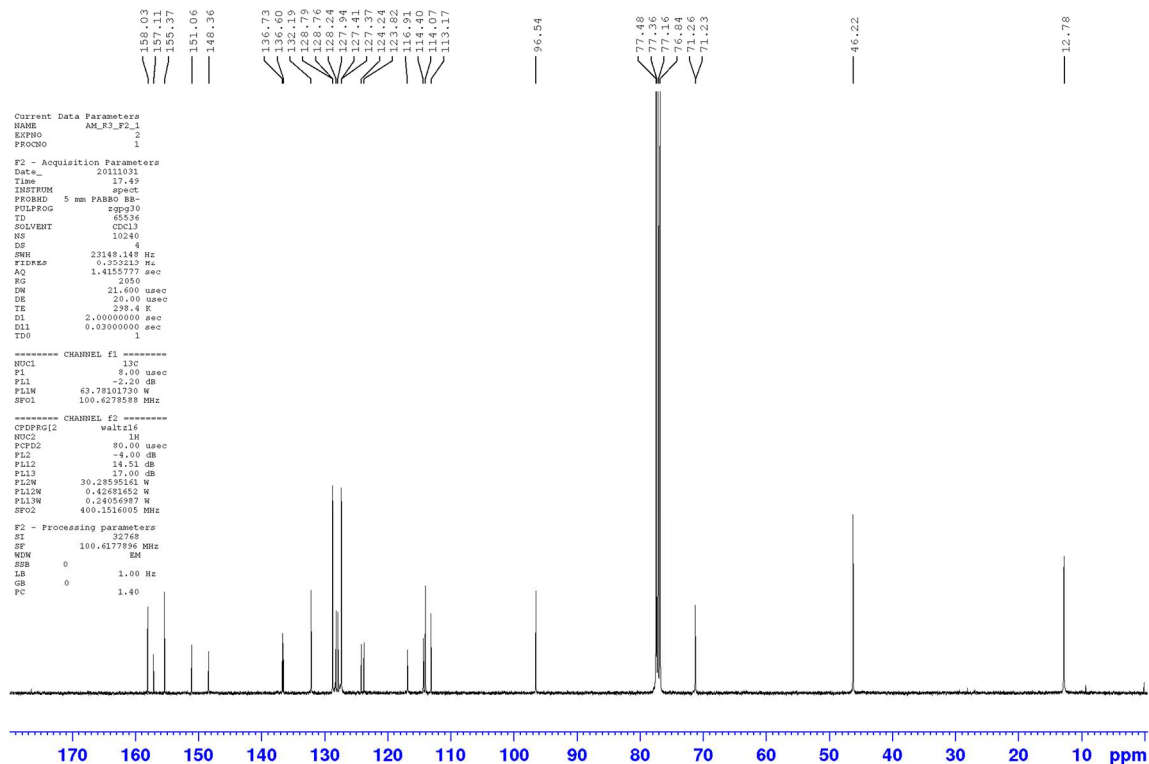

Figure S9.  $^{13}\text{C}$  NMR spectrum (100.63 MHz,  $\text{CDCl}_3$ ) of 2.

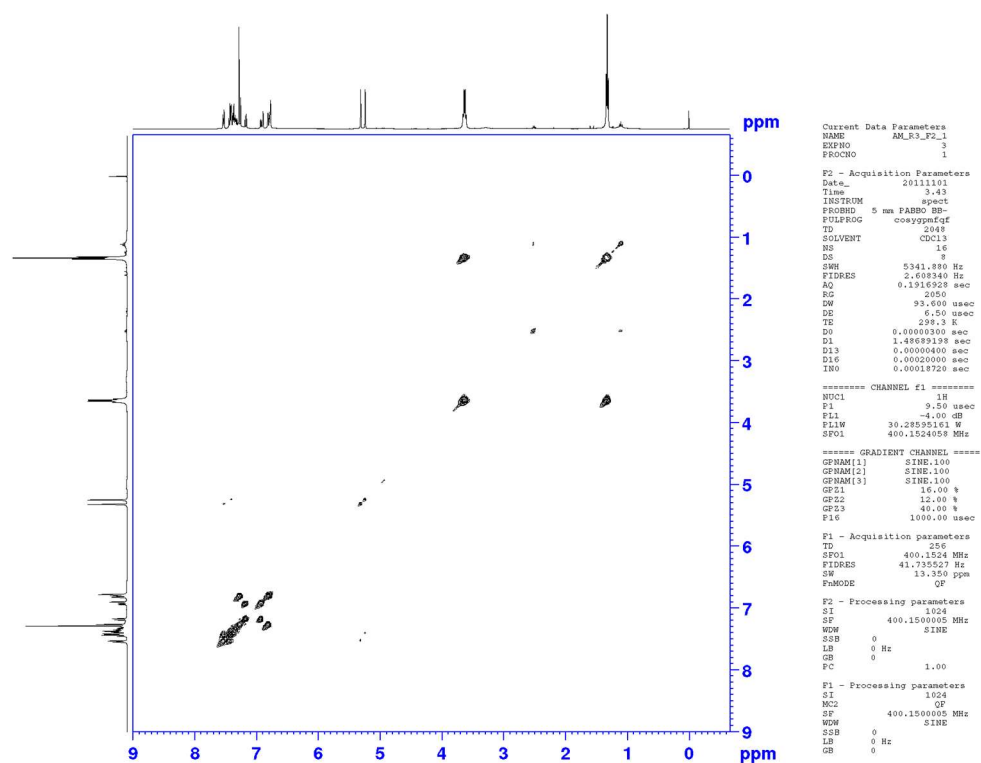

Figure S10. COSY spectrum of 2.

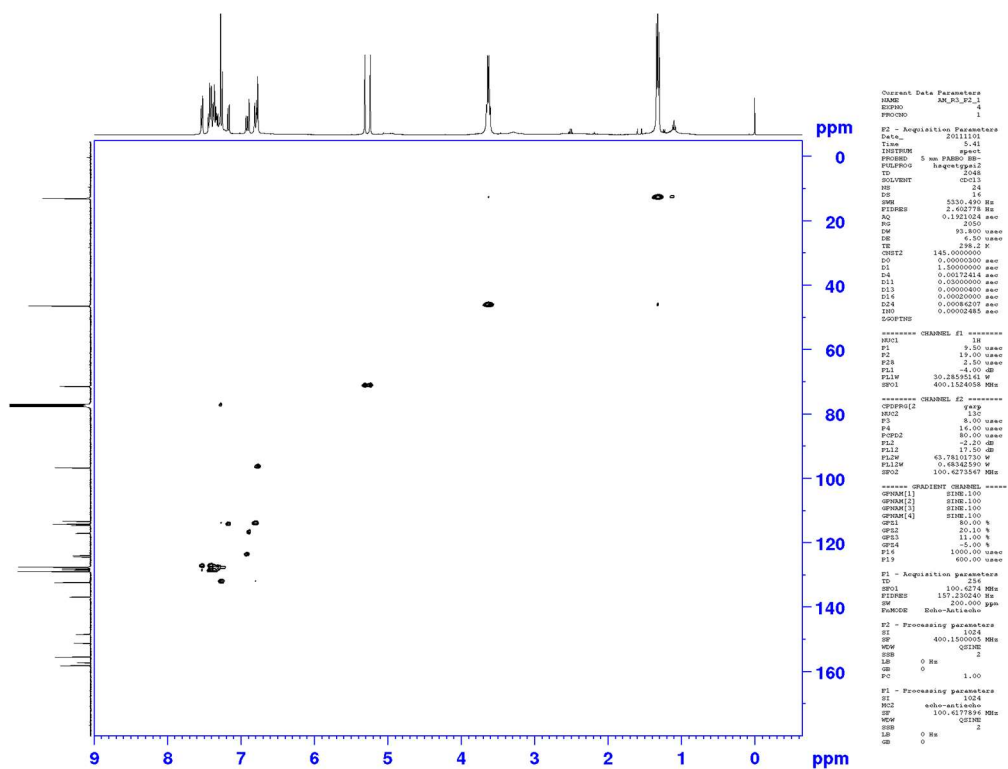

Figure S11. HSQC spectrum of 2.

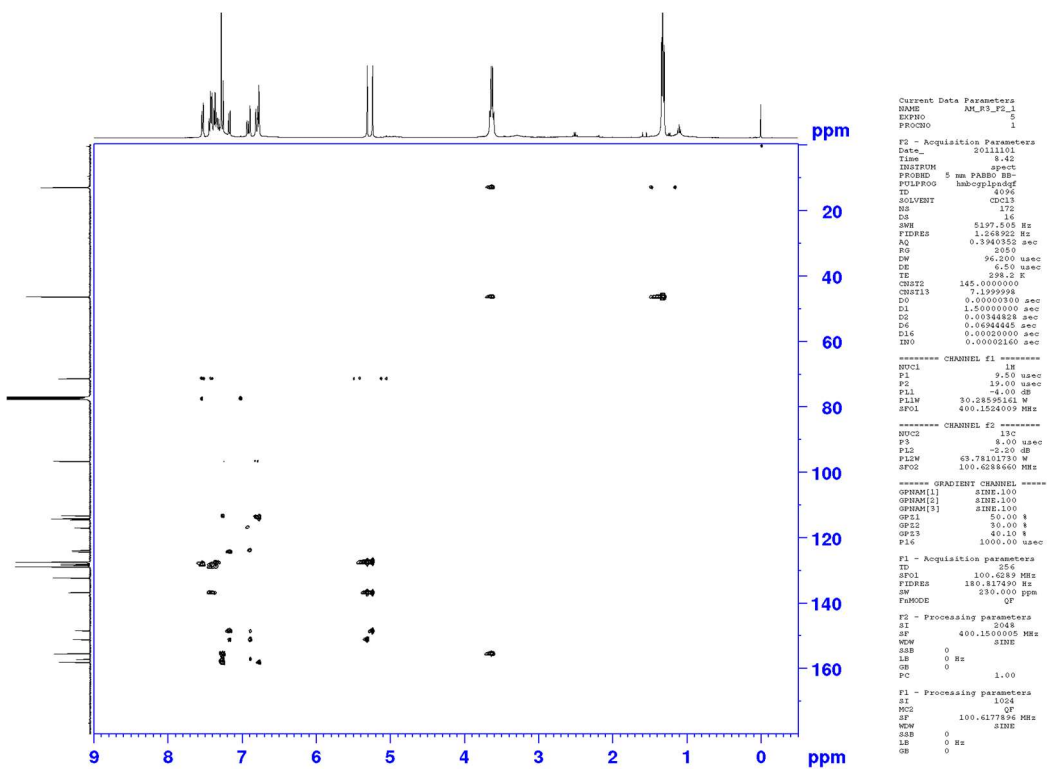

Figure S12. HMBC spectrum of **2**.

### NMR spectra of rosamine 3

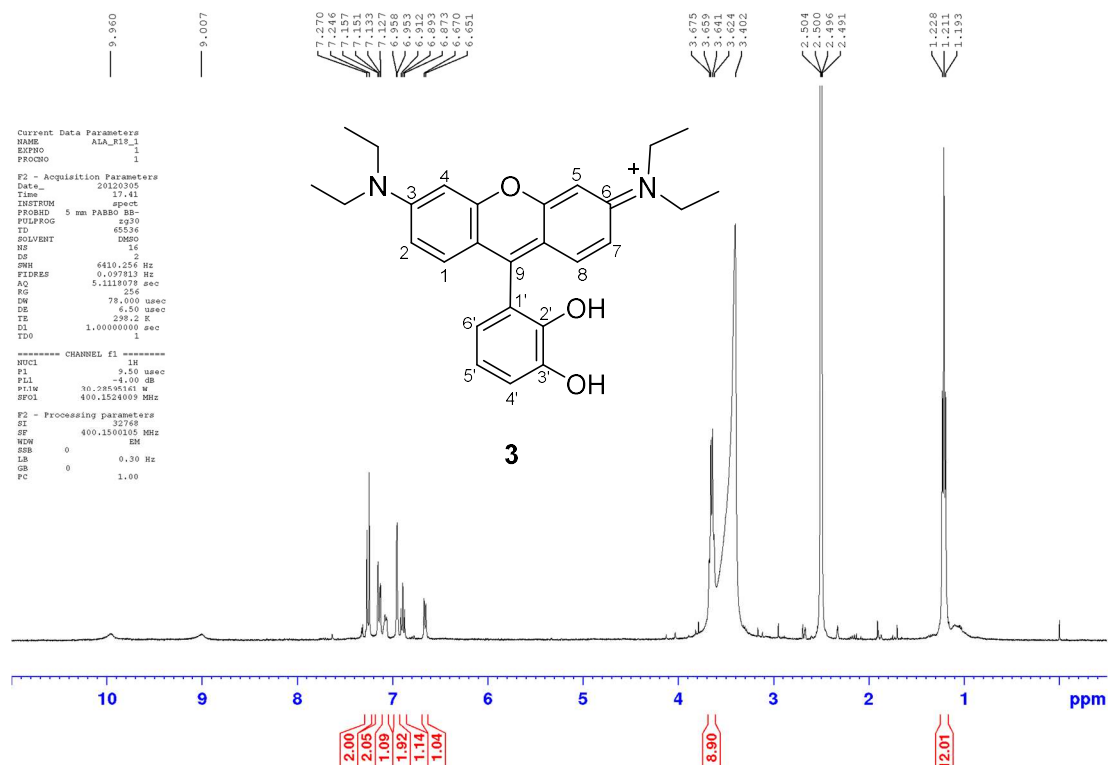

Figure S13.  $^1\text{H}$  NMR spectrum (400.15 MHz, DMSO- $d_6$ ) of **3**.



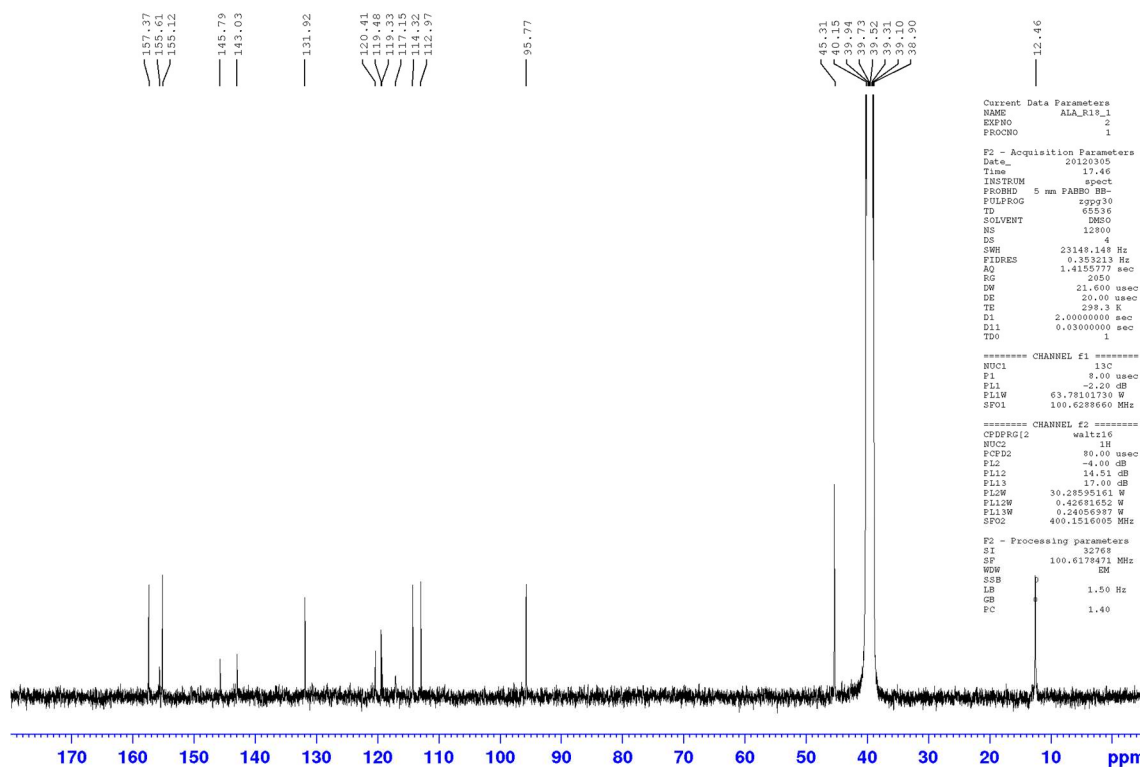

Figure S14.  $^{13}\text{C}$  NMR spectrum (100.63 MHz, DMSO- $d_6$ ) of **3**.

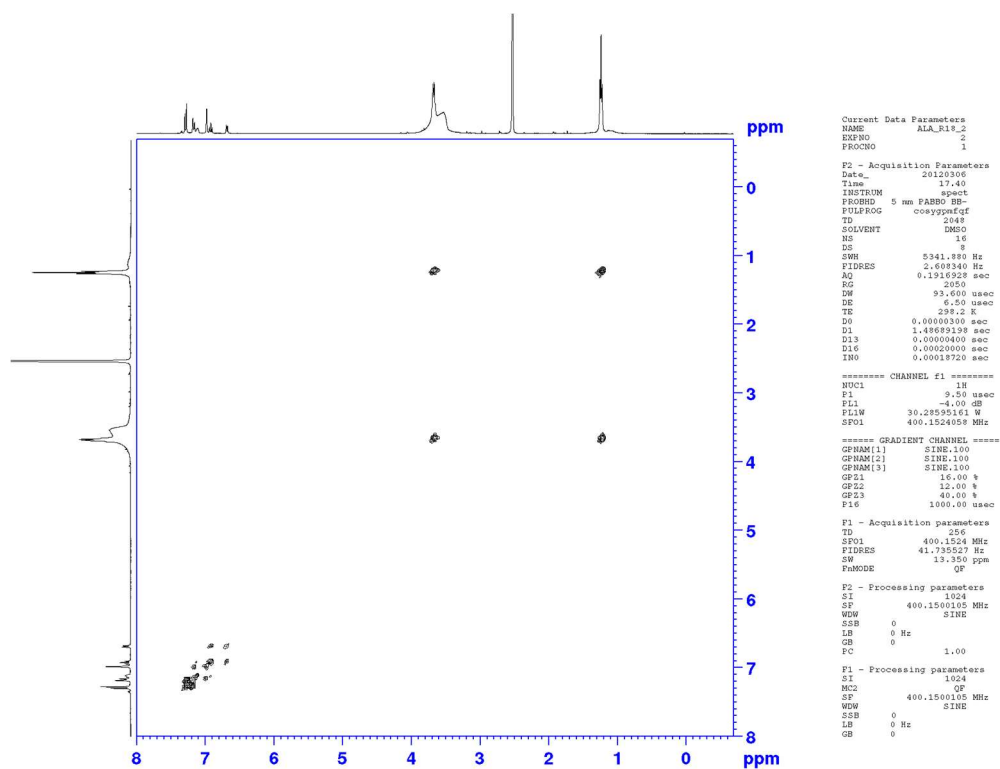

Figure S15. COSY spectrum of **3**.

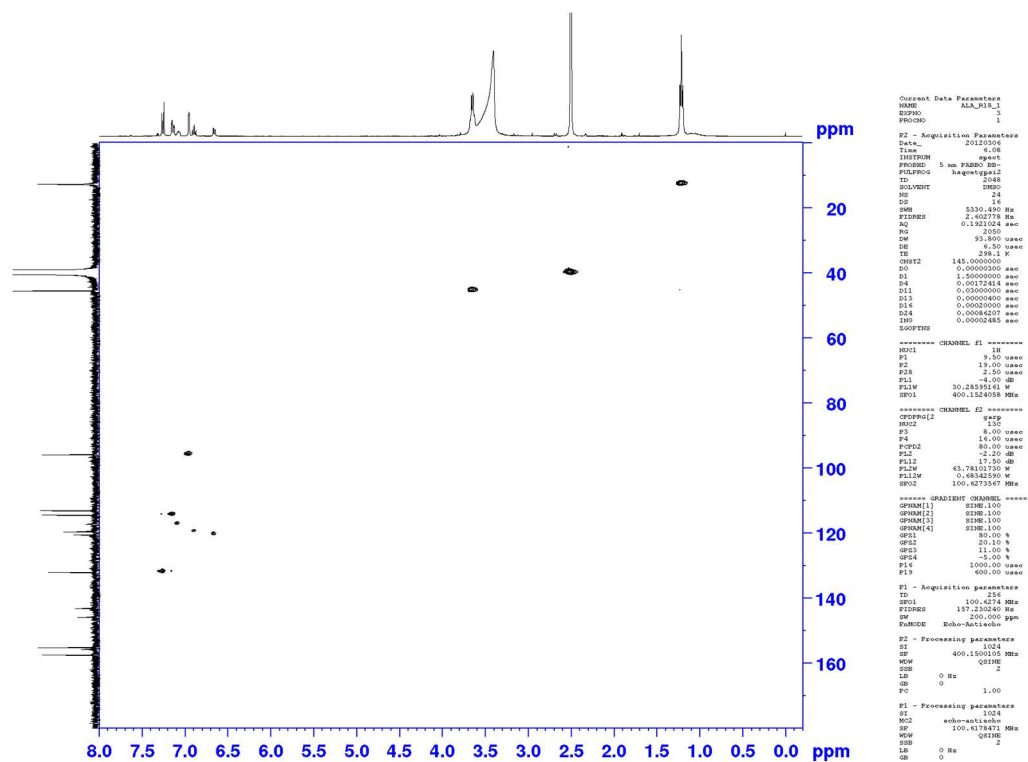

**Figure S16.** HSQC spectrum of **3**.

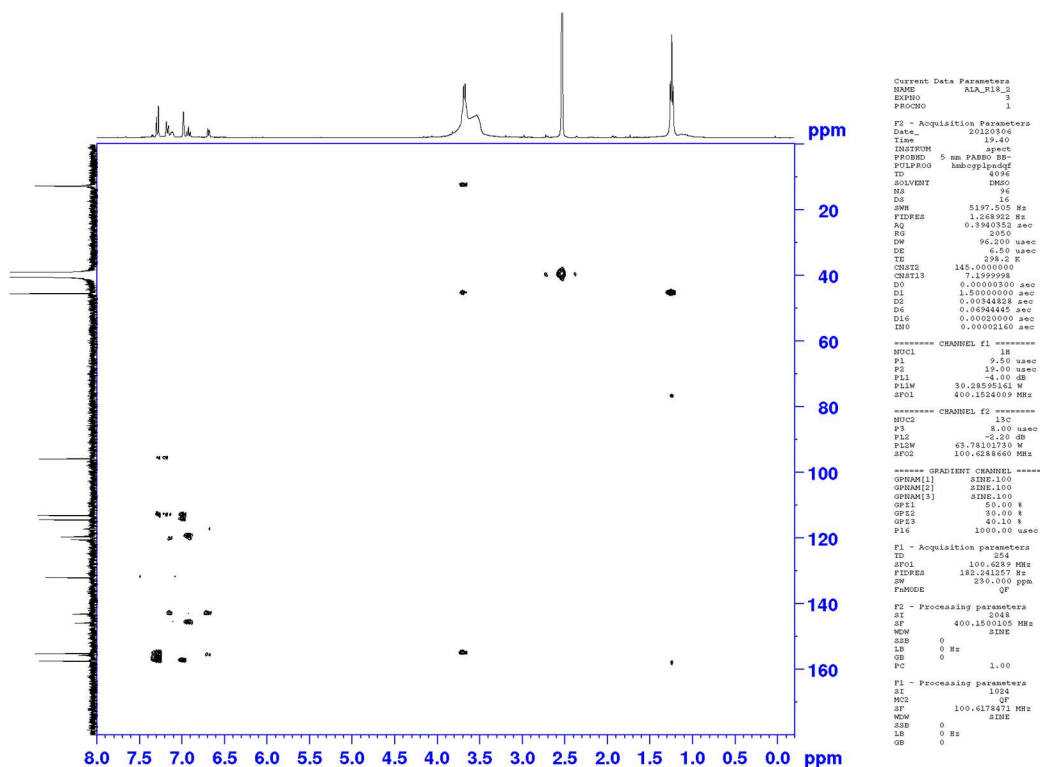

**Figure S17.** HMBC spectrum of **3**.

# NMR spectra of rosamine 4

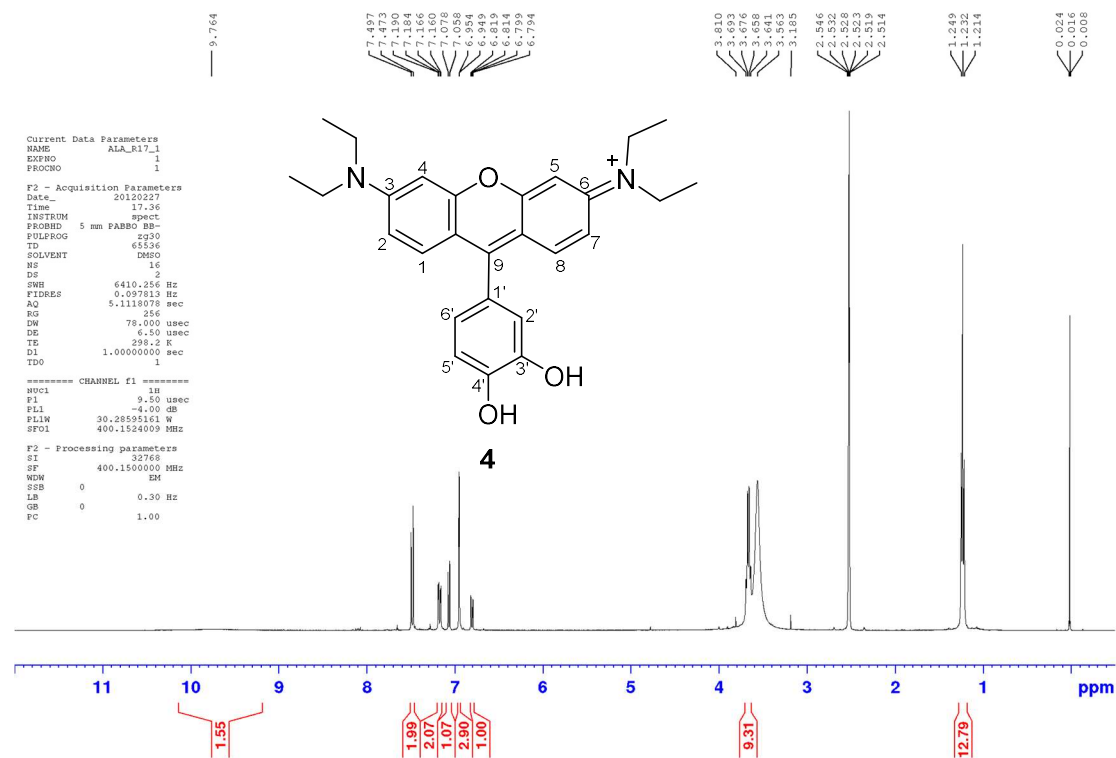

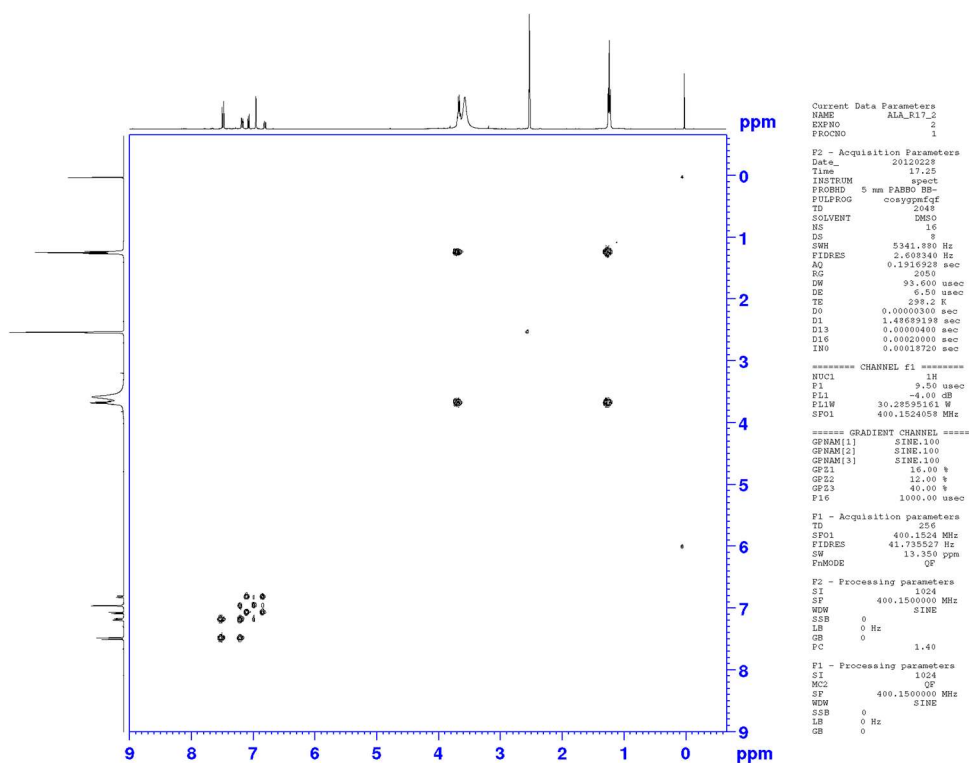

Figure S20. COSY spectrum of 4.

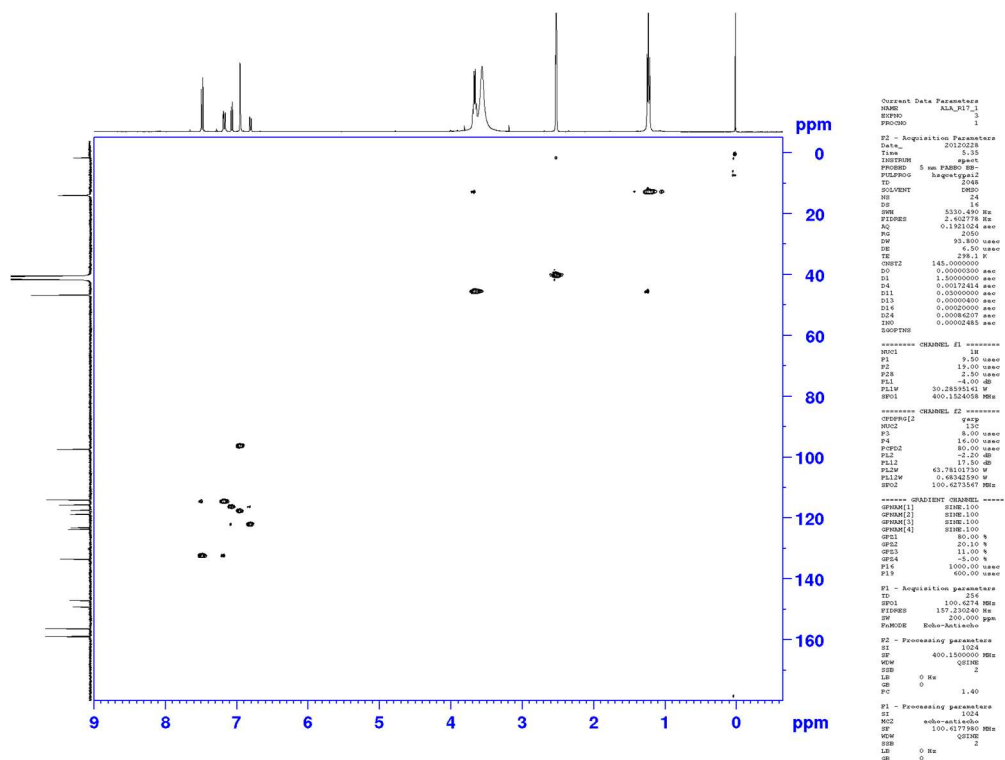

Figure S21. HSQC spectrum of 4.

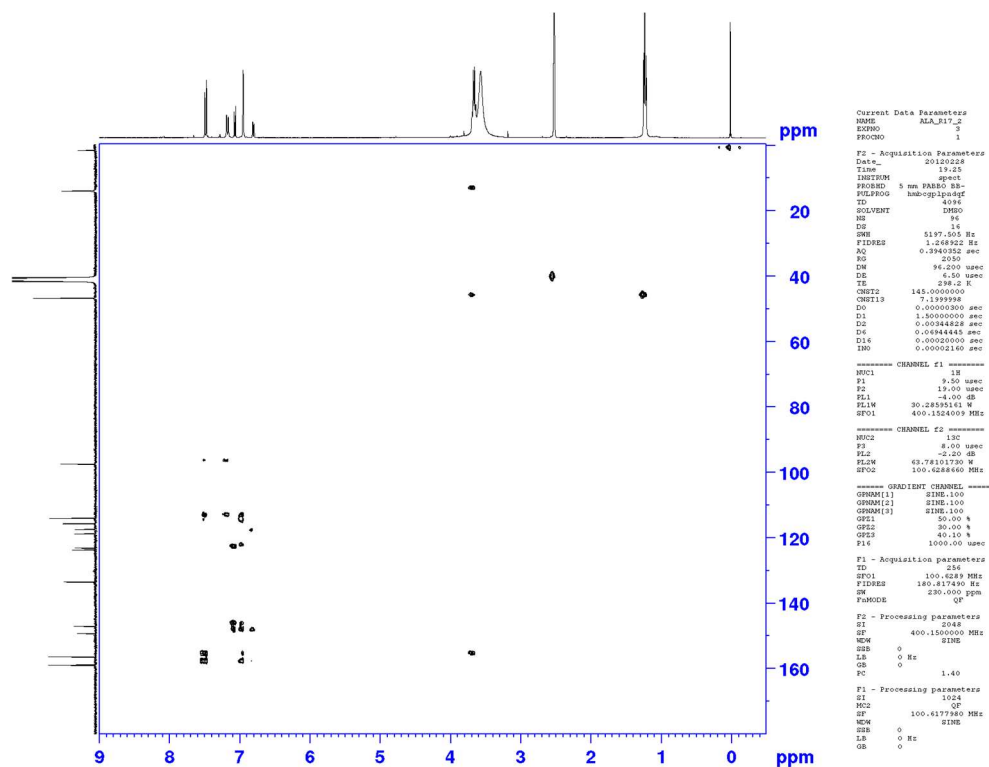

Figure S22. HMBC spectrum of 4.

### MS spectra of 1, 2, 3 and 4

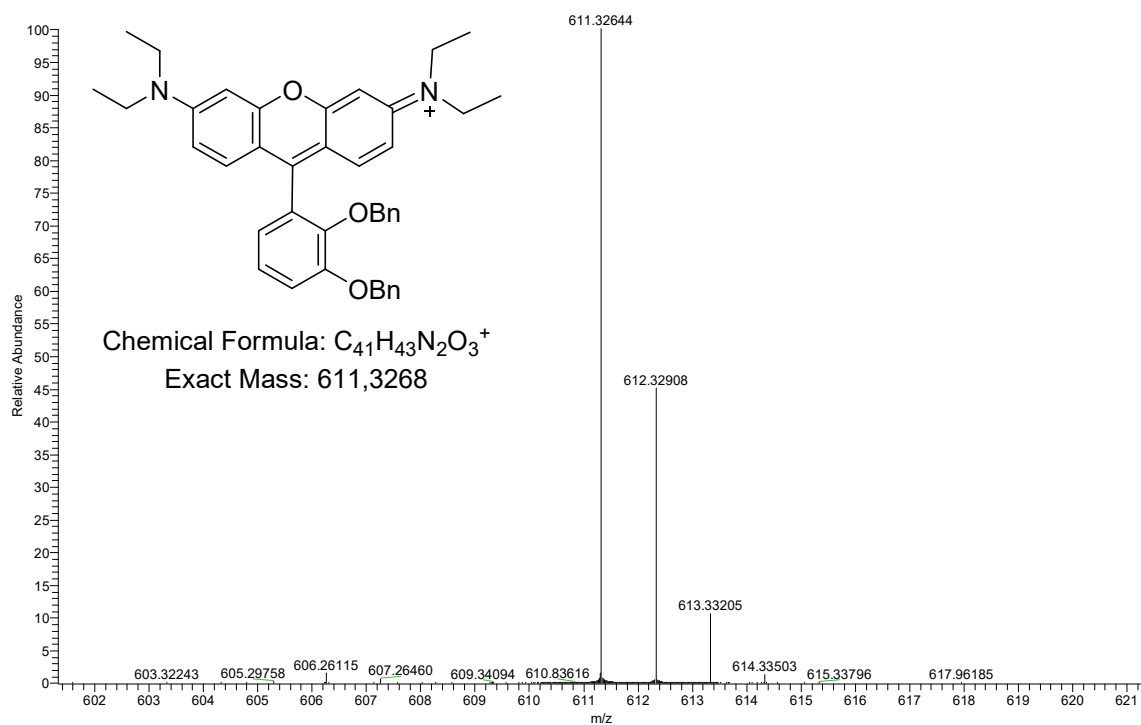

Figure S23. MS spectrum of 1

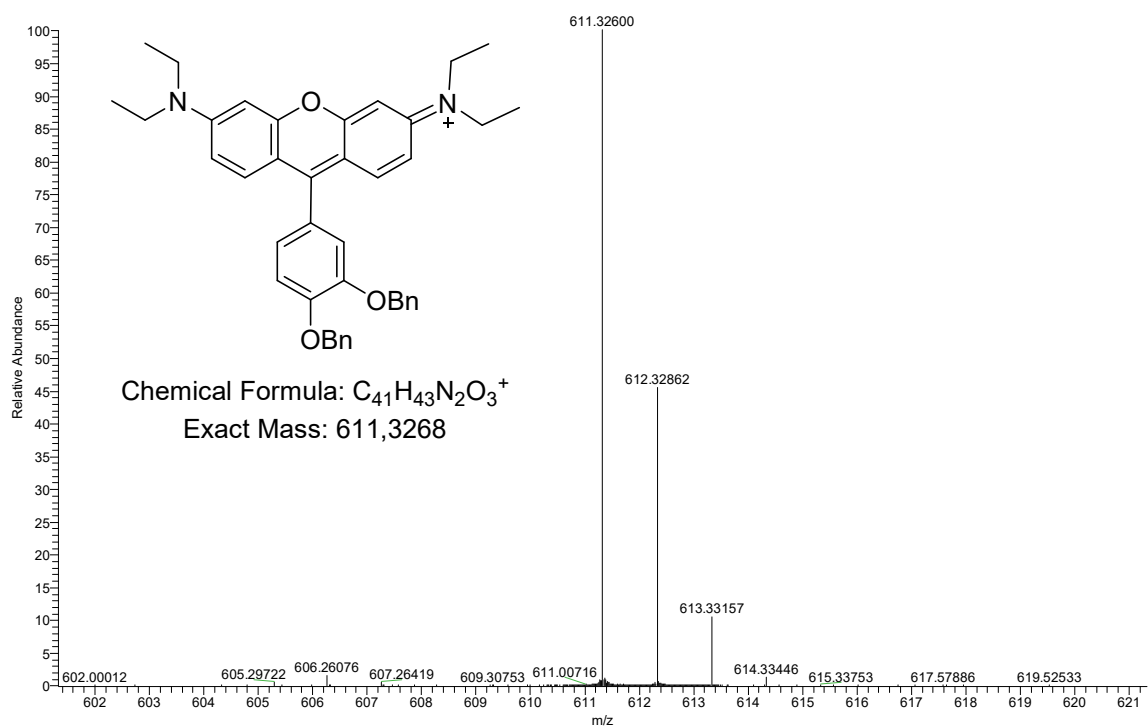

**Figure S24.** MS spectrum of **2**

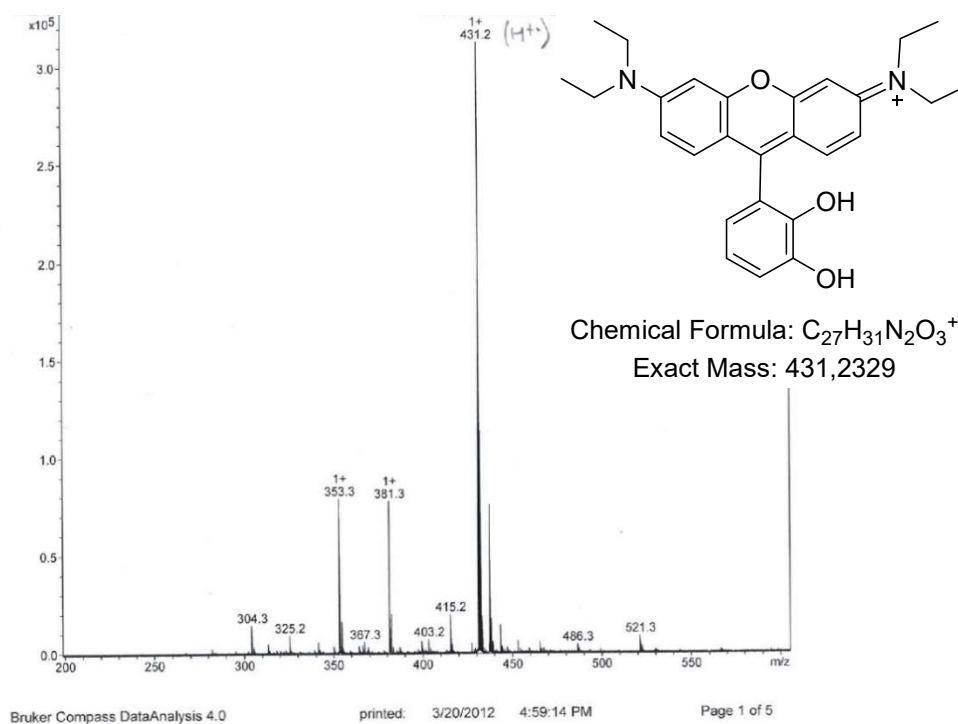

**Figure S25.** MS spectrum of **3**

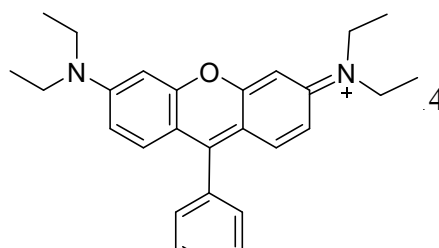

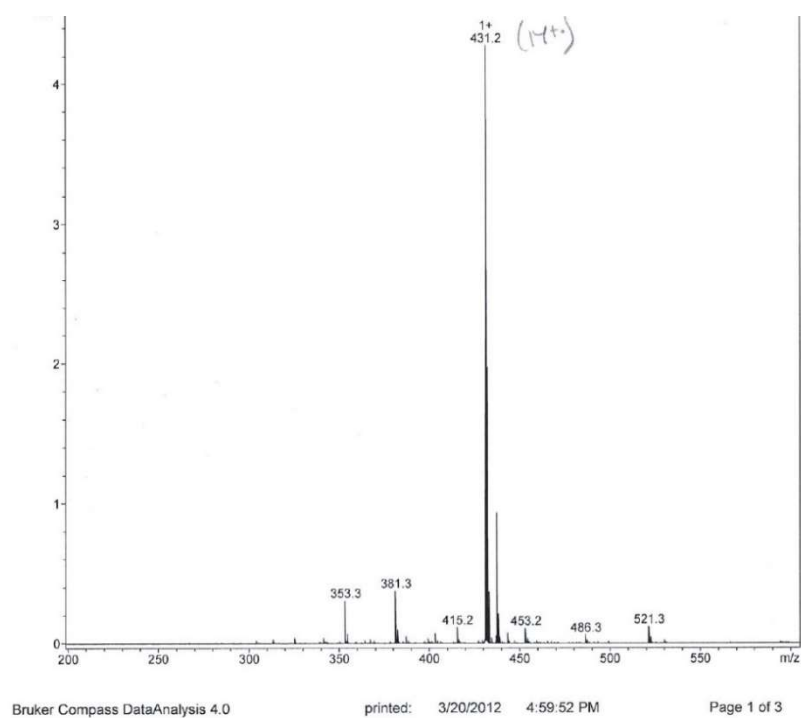

**Figure S26.** MS spectrum of **4**

**The influence of pH variation in the fluorescence intensity of rosamine 4.**

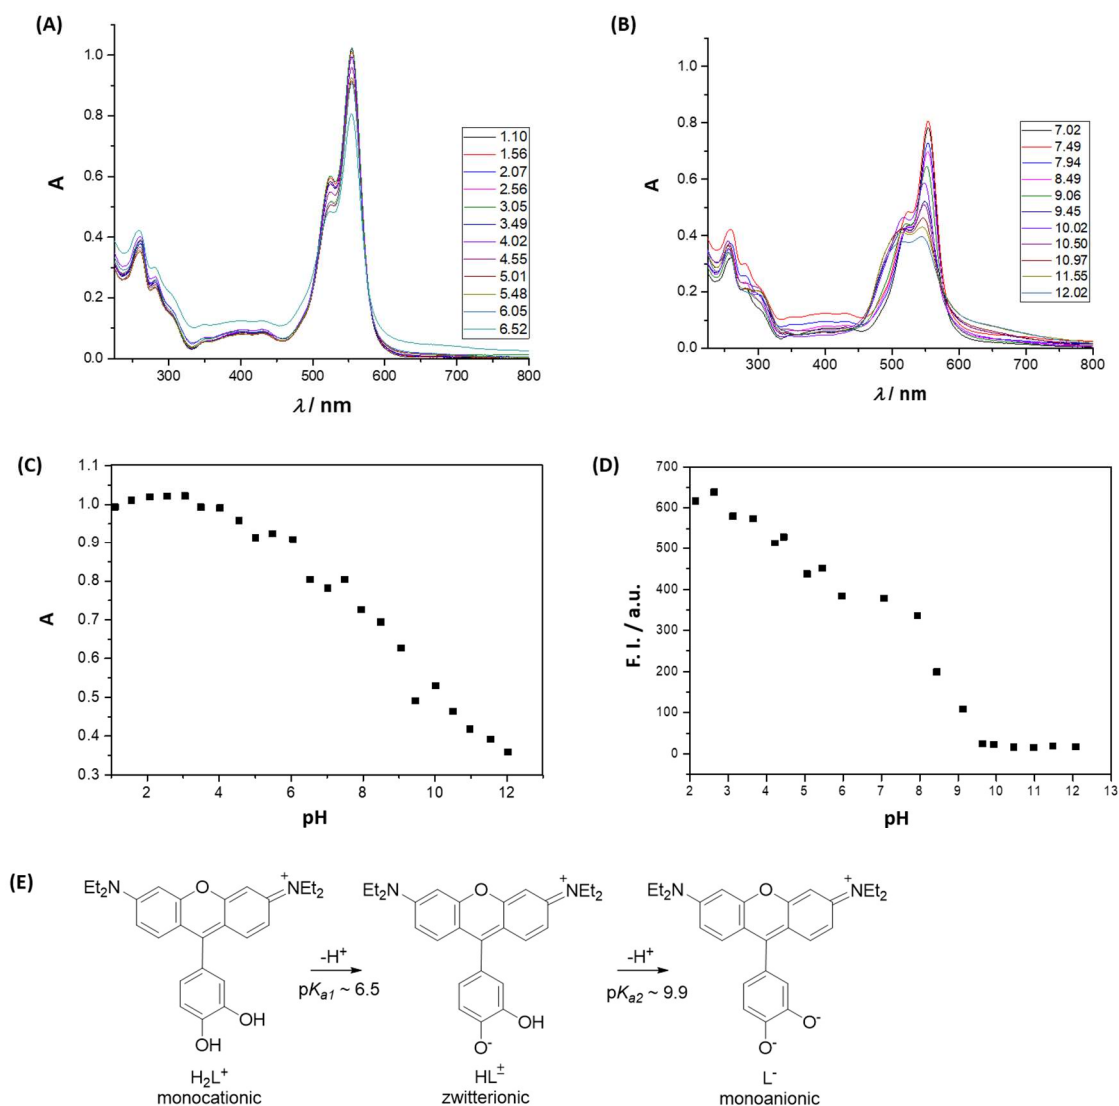

**Figure S27.** The influence of pH variation in the fluorescence intensity of rosamine 4. A – Absorption spectra for pH < 7; B – Absorption spectra for pH  $\geq$  7; C – Graphical representation of the pH in function of the maximum in absorbance; D – Graphical representation of the pH as a function of the maximum in fluorescence intensity; E – Structures and  $pK_a$ 's of rosamine 4 deprotonation.

**Detection study of rosamine 4 with different biogenic amines in solution (preliminary study)**



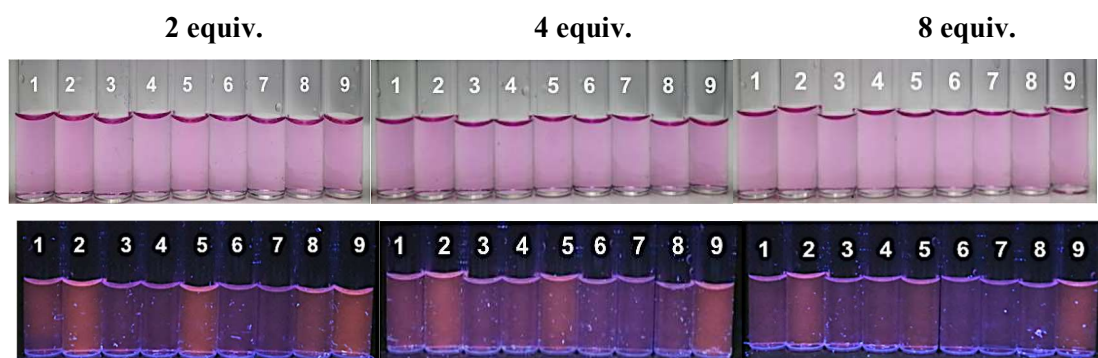

**Figure S28.** Samples with 2, 4 and 8 equiv. of 1-histamine, 2-tyramine, 3-cadaverine, 4-putrescine, 5-phenylethylamine, 6-spermidine, 7-spermine, 8-butylamine, 9- rosamine **4**, observed under visible (top) and UV light (bottom).

### Detection study of rosamine 4 with different amines in solution (CH<sub>3</sub>CN)

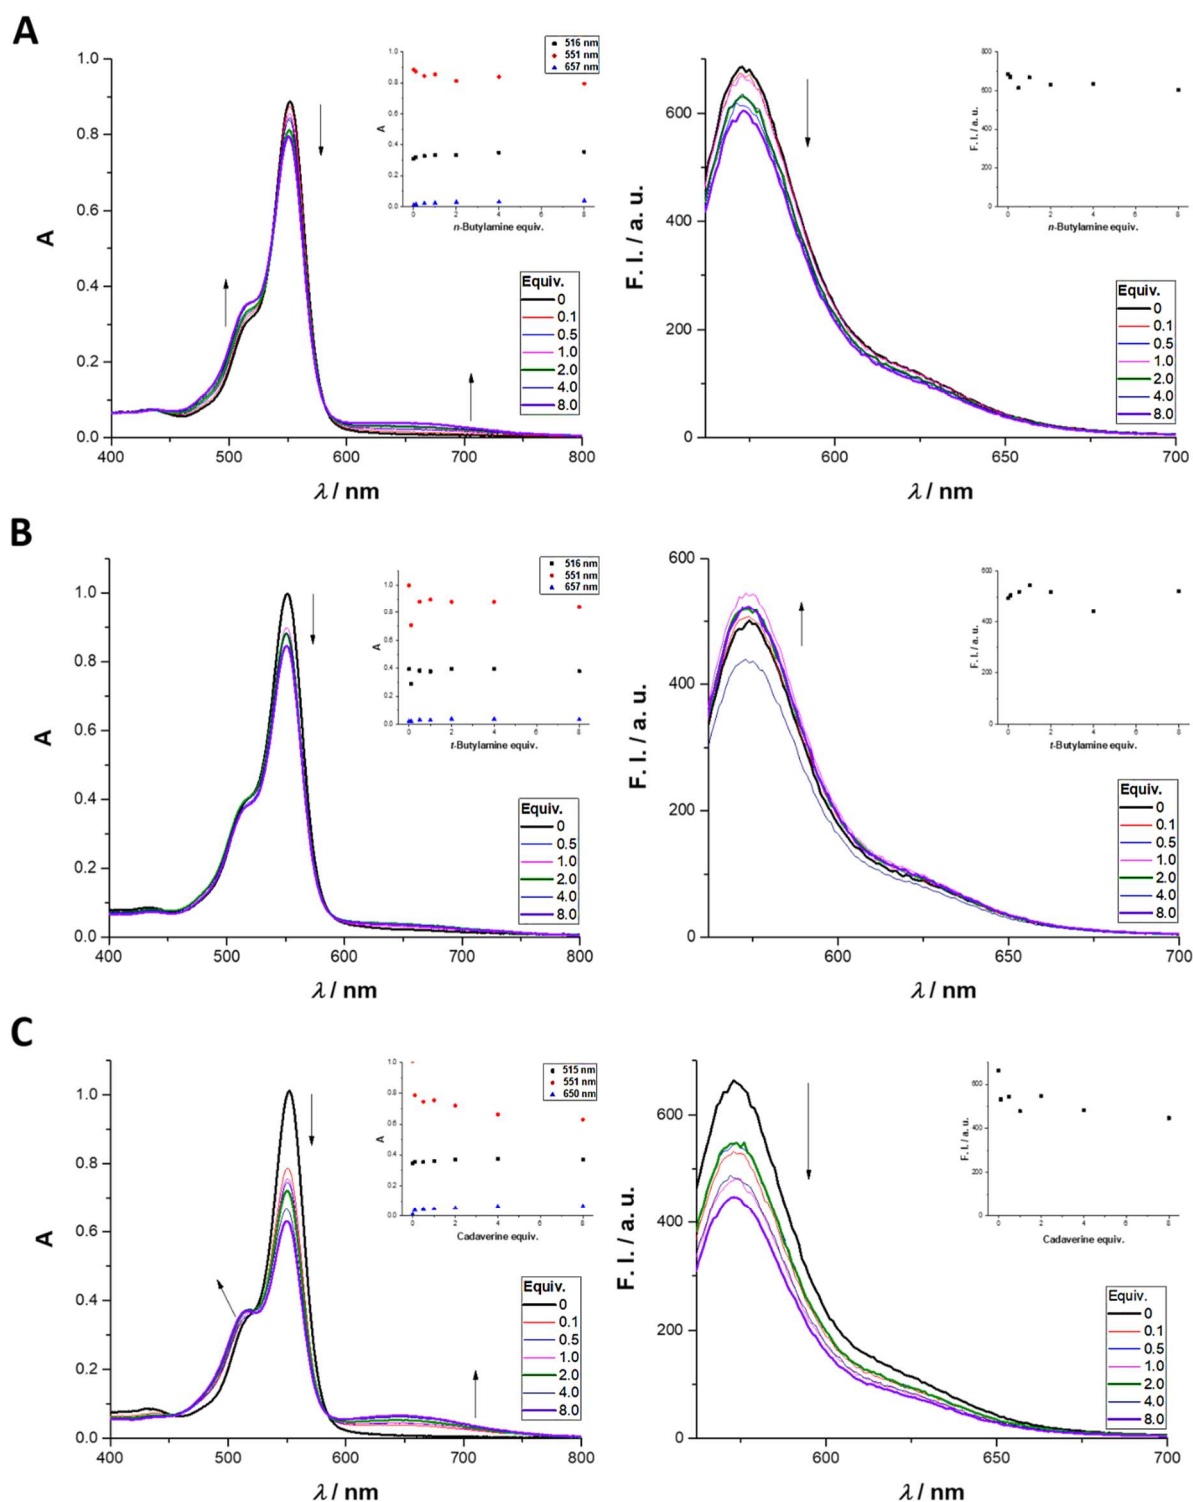

**Figure S29.** Absorption (left) and emission (right) spectra of **4** upon addition (0 – 8 equiv.) of *n*-butylamine (A), *t*-butylamine (B) and cadaverine (C) in CH<sub>3</sub>CN (the inset graphs represent the variation in absorbance (right) and fluorescence intensity (left) for the wavelengths that present more variation in intensity.  $[\mathbf{4}] = 35 \mu\text{M}$  and  $\lambda_{\text{exc}} = 551 \text{ nm}$ ).

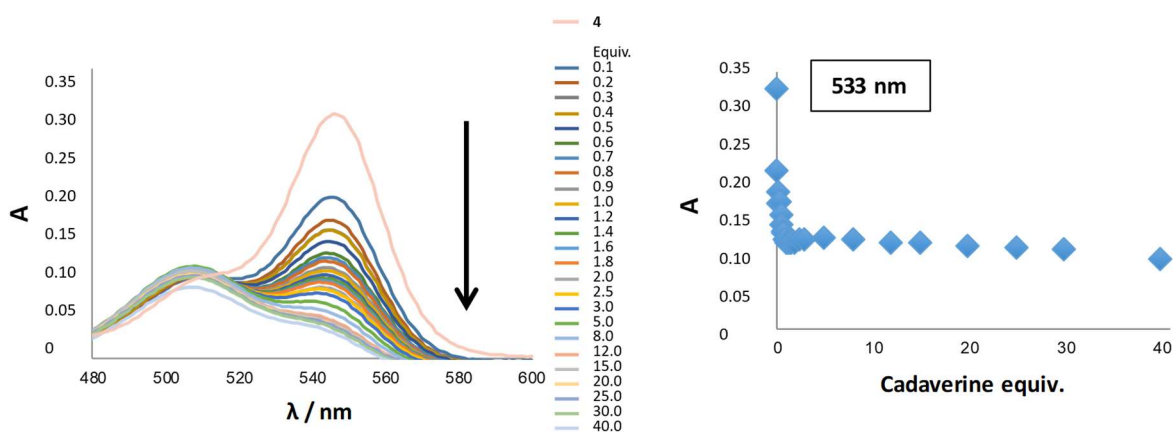

**Figure S30.** Absorption (left) spectrum of **4** upon addition (0.1–40 equiv.) of cadaverine in CH<sub>3</sub>CN and graph representing the variation in absorbance (right) intensity at 533 nm [**4**] = 5  $\mu$ M.

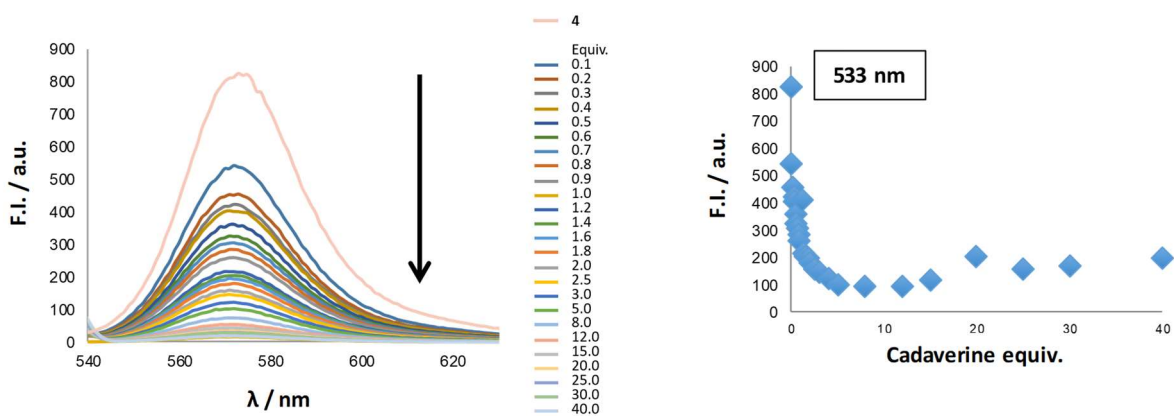

**Figure S31.** Emission (left) spectrum of **4** upon addition (0.1–40 equiv.) of cadaverine in CH<sub>3</sub>CN and graph representing the variation in emission (right) intensity [**4**] = 5  $\mu$ M and  $\lambda_{\text{exc}}$  = 533 nm.

#### Detection study of rosamine **4** with different biogenic amines in gas phase

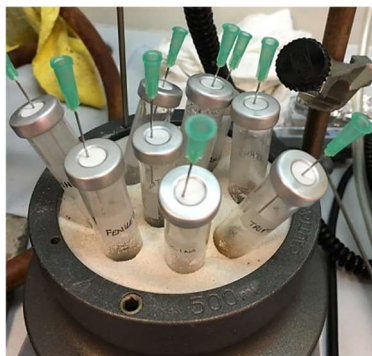

**Figure S32.** Commercial biogenic amine samples subjected to heat

## NMR spectra of aminopyronin 5

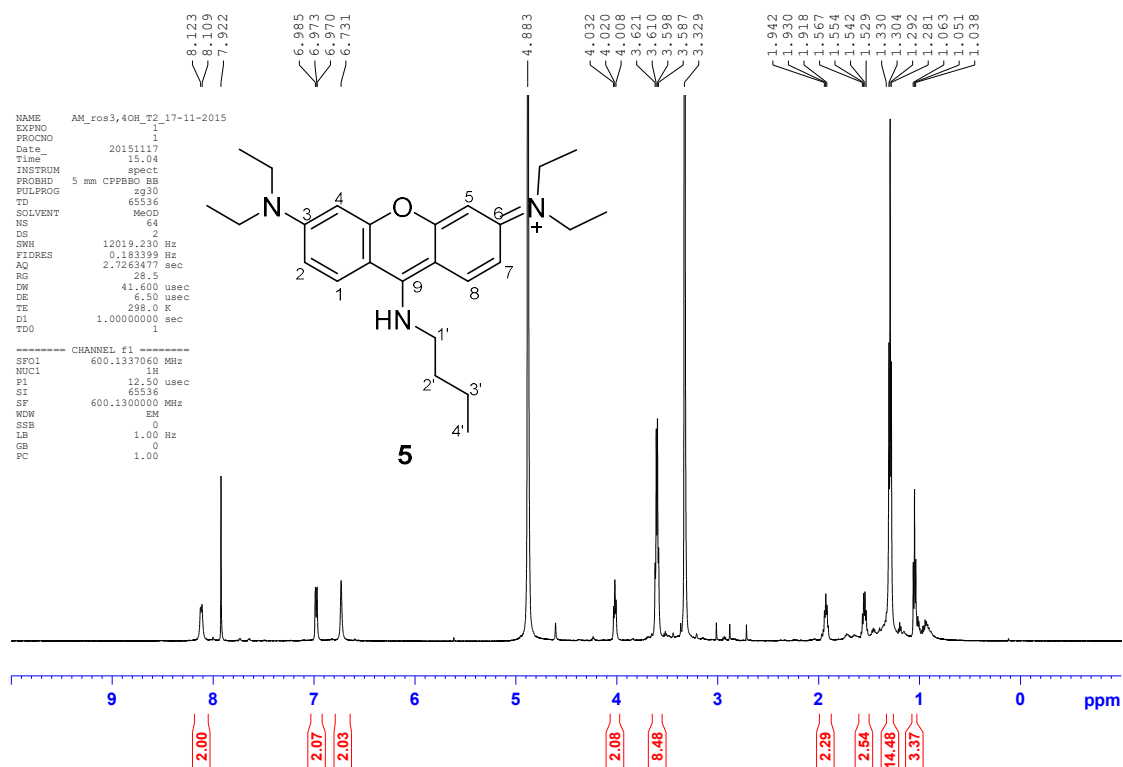

**Figure S33.** <sup>1</sup>H NMR spectrum (600.13 MHz, MeOD-d<sub>4</sub>) of **5**.

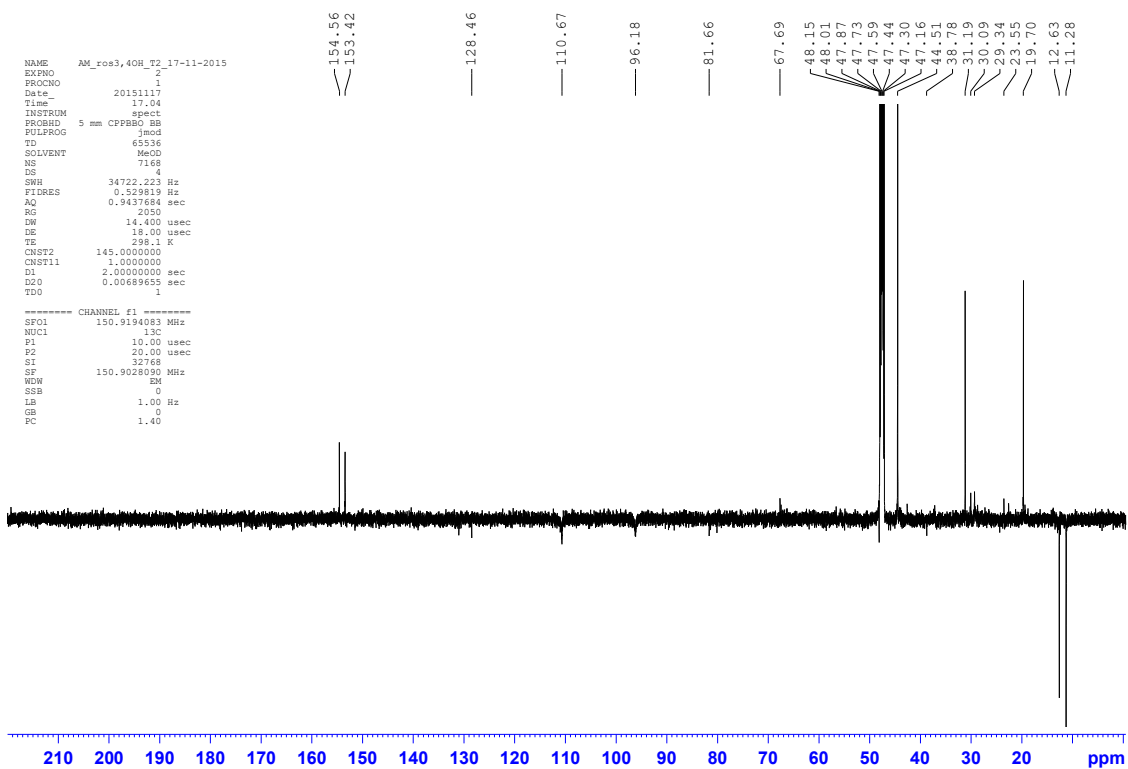

**Figure S34.** APT spectrum (150.90 MHz, MeOD-d<sub>4</sub>) of **5**.

**$^1\text{H}$  NMR spectrum comparison between rosamine 4 and aminopyronin 5**

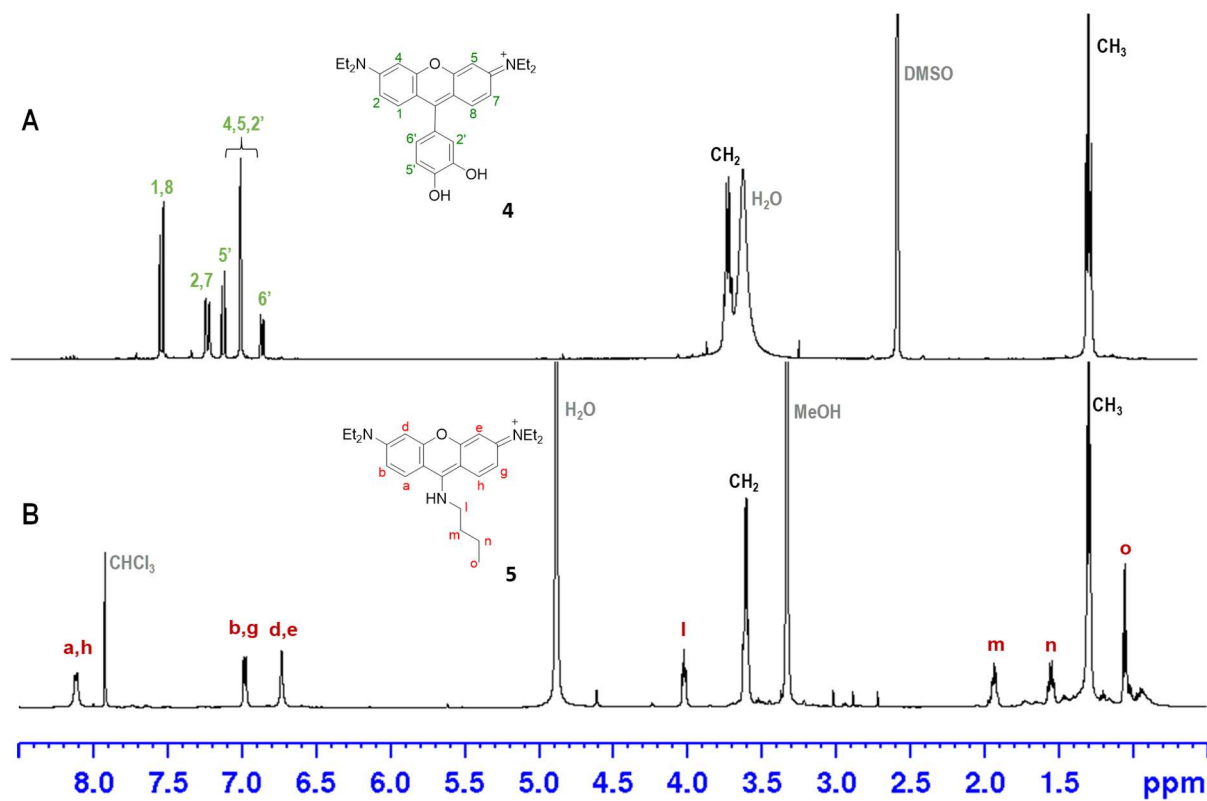

**Figure S35.**  $^1\text{H}$  NMR spectra of **4** (A) and **5** (B).

### NMR spectrum of aminopyronin 6a

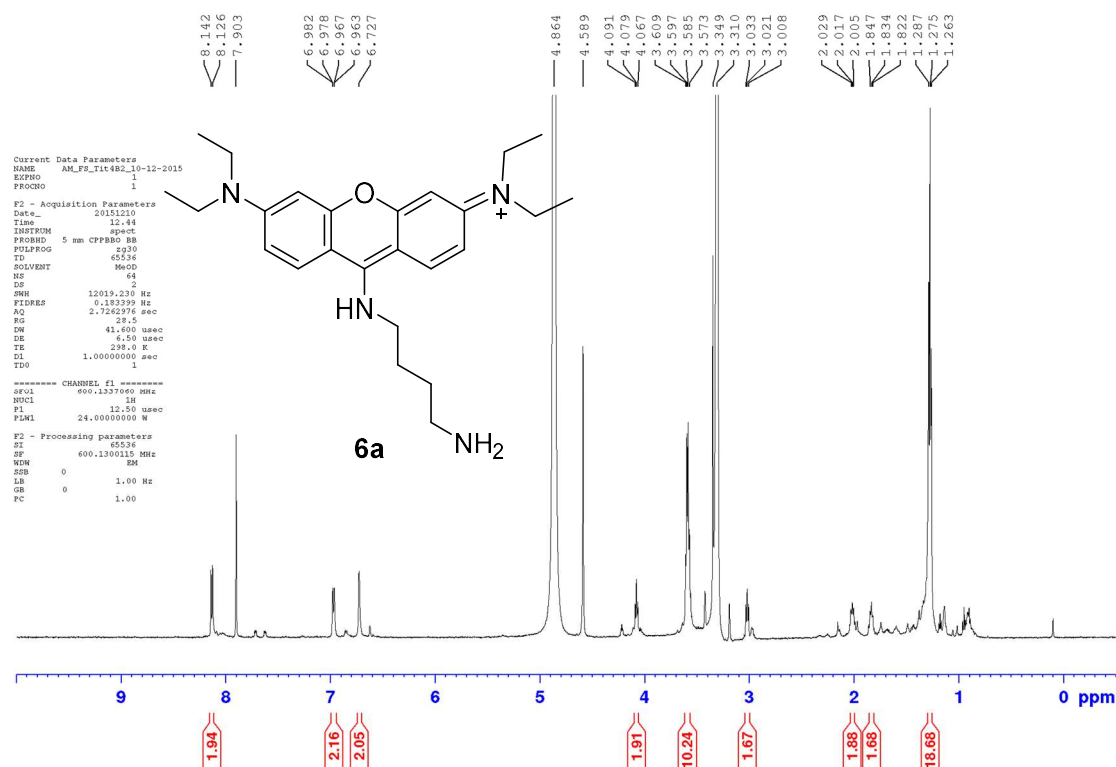

Figure S36. <sup>1</sup>H NMR spectrum (600.13 MHz, MeOD-d<sub>4</sub>) of 6a.

### NMR spectrum of aminopyronin 7a

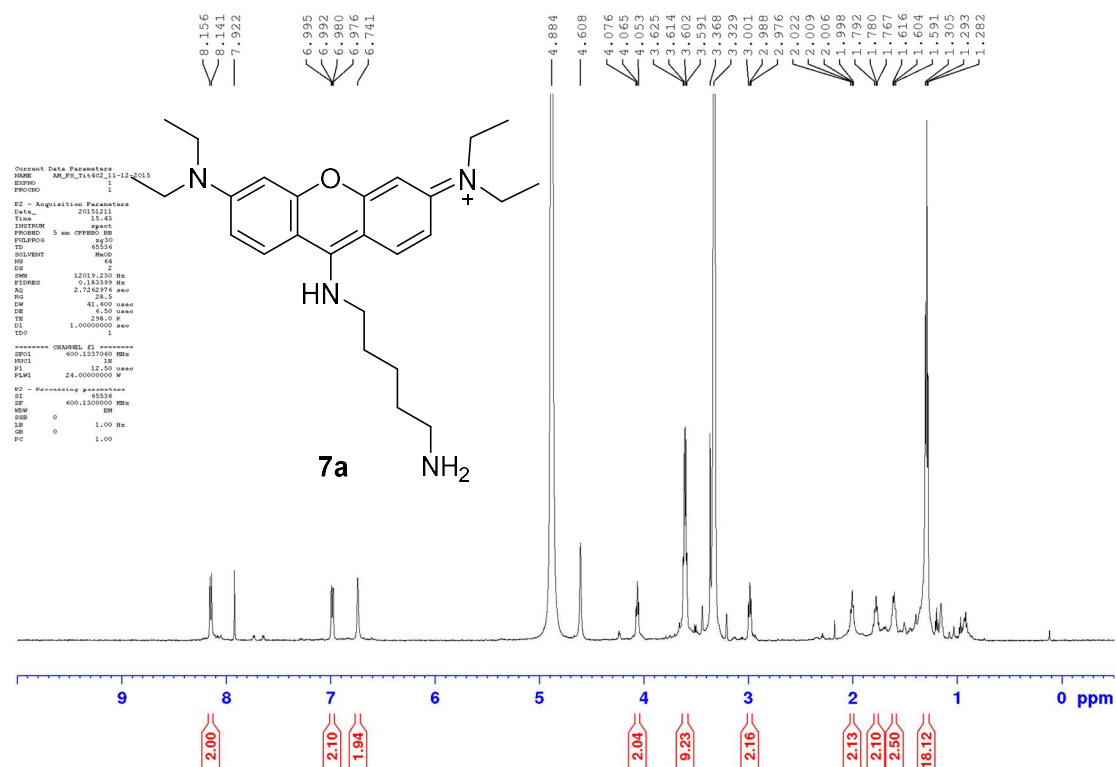

Figure S37. <sup>1</sup>H NMR spectrum (600.13 MHz, MeOD-d<sub>4</sub>) of 7a.

### NMR spectrum of aminopyronin 7b

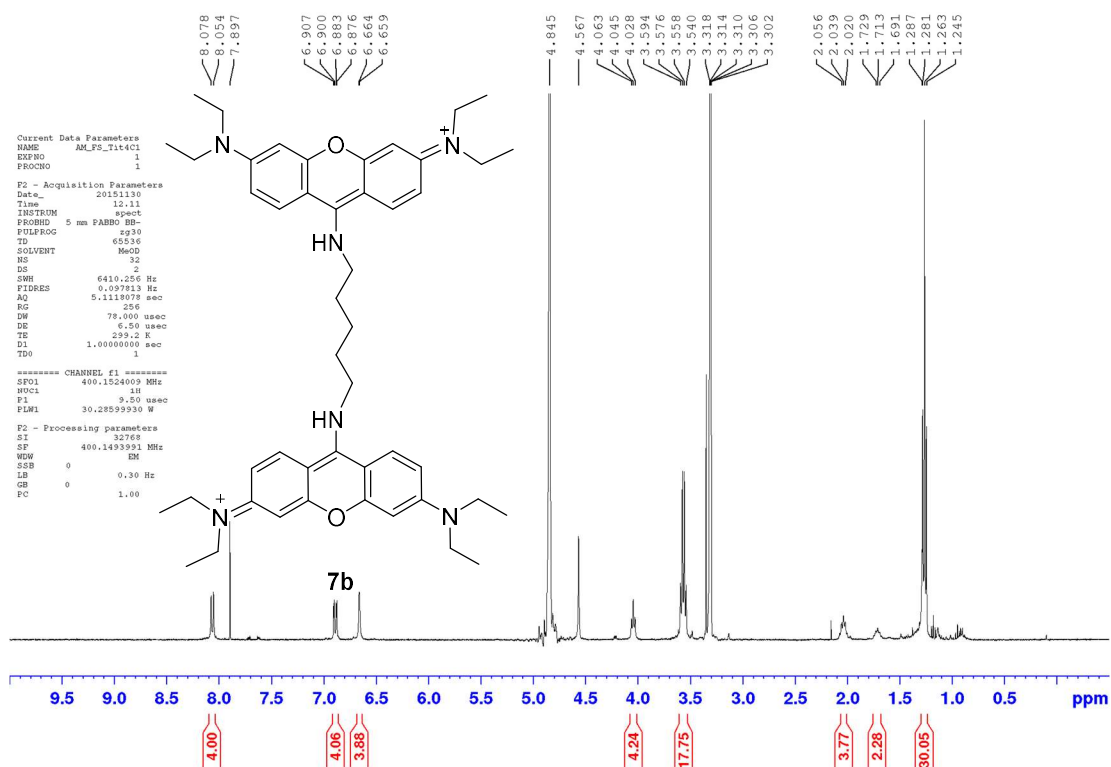

Figure S38.  $^1\text{H}$  NMR spectrum (400.15 MHz,  $\text{MeOD-d}_4$ ) of 7b.

### MS spectra of 5, 6a, 7a and 7b

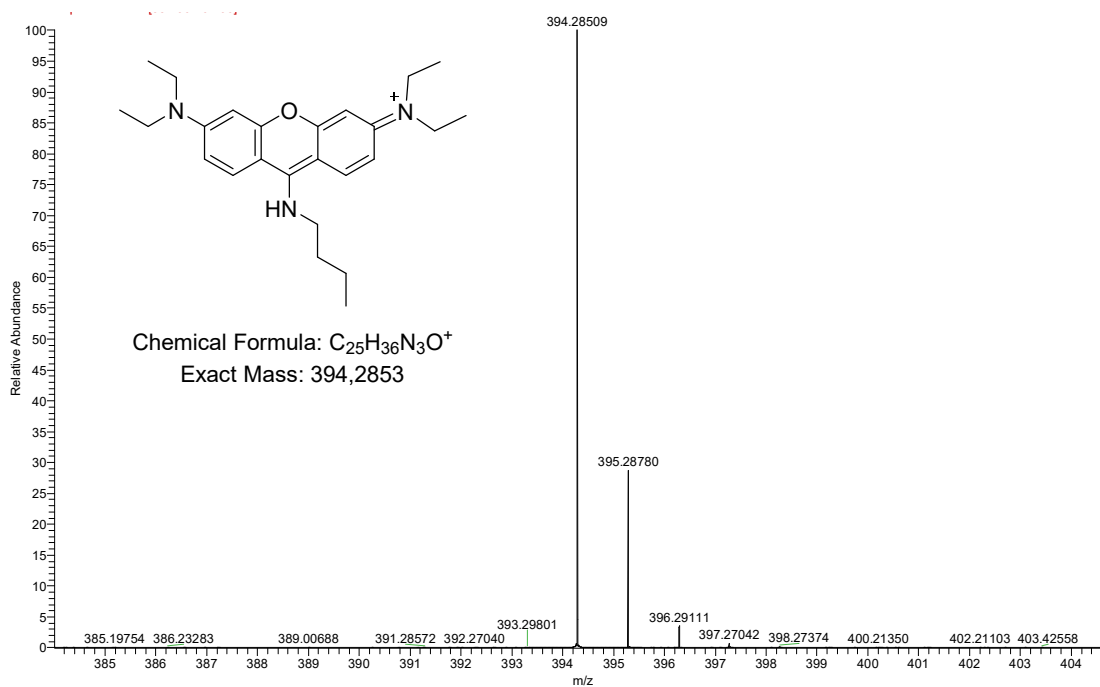

Figure S39. MS spectrum of 5.

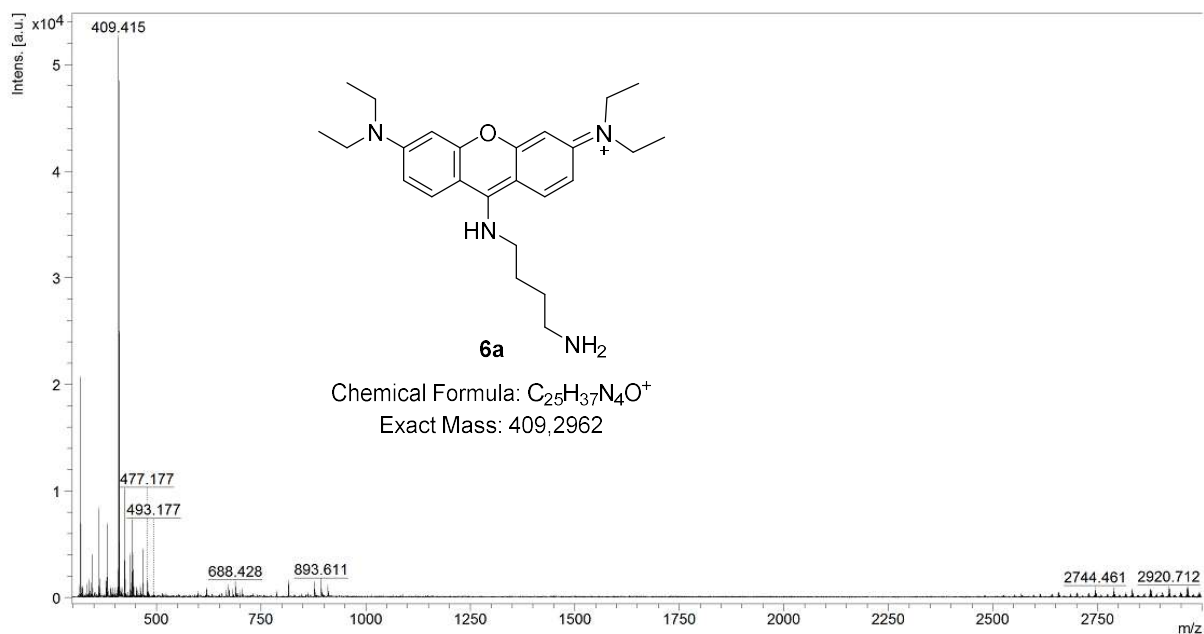

**Figure S40.** MS spectrum of **6a**.

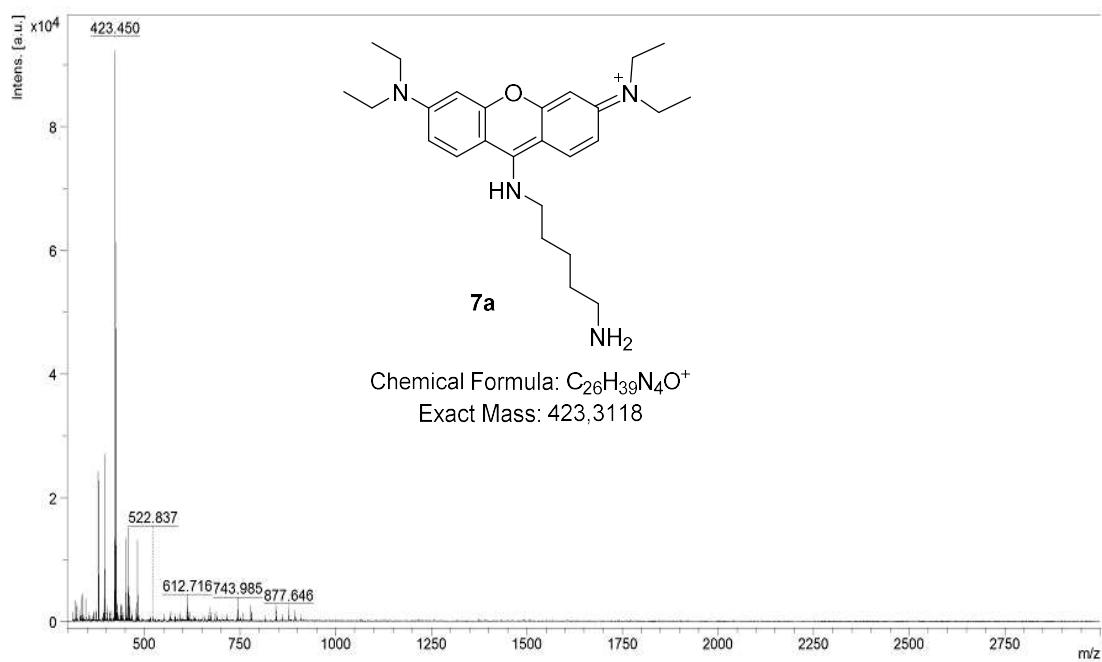

**Figure S41.** MS spectrum of **7a**.



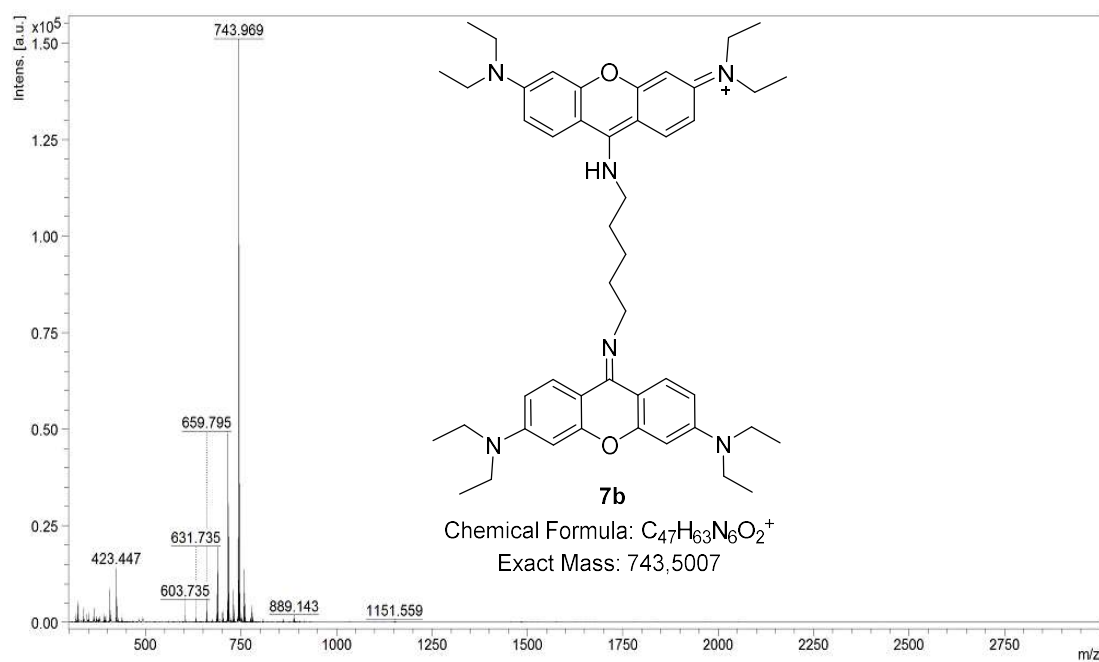

**Figure S42.** MS spectrum of **7b**.
